# Supplementary material for: A plasmachemical axially symmetric self-consistent model of daytime sprite
Source: Copernicus journal article supplement (doi:10.5194/acp-2019-1196), 2020-04-20
Supplement: Supplementary file 1 [file acp-2019-1196-supplement.pdf]

# 1 Reactions

Cosmic ray background:

- R1.  $Q + N_2 \rightarrow N_2^+ + e + Q$  ;  $k_1 = 0.585/M$  ; [2]  
 R2.  $Q + O_2 \rightarrow O_2^+ + e + Q$  ;  $k_2 = 0.154/M$  ; [2]  
 R3.  $Q + N_2 \rightarrow N^+ + N + e + Q$  ;  $k_3 = 0.185/M$  ; [2]  
 R4.  $Q + O_2 \rightarrow O^+ + O + e + Q$  ;  $k_4 = 0.076/M$  ; [2]

Electric field driven processes:

- R5.  $e + N_2 \rightarrow e + N_2(A)$  ;  $k_5 = 10^{(-8.4-140/\theta)}$  ; [1]  
 R6.  $e + N_2 \rightarrow e + N_2(B)$  ;  $k_6 = 10^{(-8.3-154/\theta)} + 10^{(-8.7-168/\theta)} + 10^{(-8.2-148/\theta)}$  ; [1]  
 R7.  $e + N_2 \rightarrow e + N_2(a)$  ;  $k_7 = 10^{(-8.8-167/\theta)} + 10^{(-8.3-174/\theta)} + 10^{(-8.8-175/\theta)}$  ; [1]  
 R8.  $e + N_2 \rightarrow e + N_2(C)$  ;  $k_8 = 10^{(-8.2-211/\theta)} + 10^{(-10.1-254/\theta)} + 10^{(-9.2-262/\theta)}$  ; [1]  
 R9.  $e + O_2 \rightarrow e + O_2(a)$  ;  $k_9 = \begin{cases} 10^{(-9.0-52/\theta)}, & \theta < 40Td \\ 10^{(-10.2-3.5/\theta)}, & \theta \geq 40Td \end{cases}$  ; [1]  
 R10.  $e + O_2 \rightarrow e + O_2(b)$  ;  $k_{10} = \begin{cases} 10^{(-9.5-60/\theta)}, & \theta < 30Td \\ 10^{(-11.2-72/\theta)}, & \theta \geq 30Td \end{cases}$  ; [1]  
 R11.  $e + N_2 \rightarrow e + N + N(^2D)$  ;  $k_{11} = 10^{-10} \cdot \begin{cases} 3.096 - 0.671 \cdot (\frac{\theta}{10}) + 0.03 \cdot (\frac{\theta}{10})^2 - \\ -1.59 \cdot 10^{(-3)} \cdot (\frac{\theta}{10})^3 - 1.57 \cdot 10^{-5} \cdot (\frac{\theta}{10})^4, & \theta < 76Td \\ 0, & \theta \geq 76Td \end{cases}$  ; [2]  
 R12.  $e + N_2 \rightarrow e + N + N$  ;  $k_{12} = 2 \cdot 10^{-10} \cdot \begin{cases} 3.096 - 0.671 \cdot (\frac{\theta}{10}) + 0.03 \cdot (\frac{\theta}{10})^2 - \\ -1.59 \cdot 10^{(-3)} \cdot (\frac{\theta}{10})^3 - 1.57 \cdot 10^{-5} \cdot (\frac{\theta}{10})^4, & \theta < 76Td \\ 0, & \theta \geq 76Td \end{cases}$  ; [2]  
 R13.  $e + O_2 \rightarrow e + O + O(^1D)$  ;  $k_{13} = 10^{(-8.0-169/\theta)}$  ; [1]  
 R14.  $e + O_2 \rightarrow e + O + O(^1S)$  ;  $k_{14} = 10^{(-8.8-119/\theta)}$  ; [1]  
 R15.  $e + O_2 \rightarrow O_2^+ + e + e$  ;  $k_{15} = 10^{(-8.8-281/\theta)}$  ; [1]  
 R16.  $e + NO \rightarrow NO^+ + e + e$  ;  $k_{16} = 10^{(-8.8-281/\theta)}$  ; [1]  
 R17.  $e + N_2 \rightarrow N_2^+ + e + e$  ;  $k_{17} = 10^{(-8.3-365/\theta)}$  ; [1]  
 R18.  $e + O_2 \rightarrow O + O + e$  ;  $k_{18} = 10^{(-9.5-60/\theta)}$  ; [1]  
 R19.  $e + O_2 \rightarrow O^- + O$  ;  $k_{19} = \begin{cases} 10^{(-9.575-123/\theta)}, & \theta < 80Td \\ 10^{(-10.4-57/\theta)}, & \theta \geq 80Td \end{cases}$  ; [2]  
 R20.  $e + O_3 \rightarrow O_2 + O + e$  ;  $k_{20} = 10^{(-8-52/\theta)}$  ; [1]  
 R21.  $O^- + N_2 \rightarrow N_2O + e$  ;  $k_{21} = 1.16 \cdot 10^{-12} \cdot \theta^2 / (43.5 + \theta^2)$  ; [3]

Positive ion chemistry:

- R22.  $CO_2NO^+ + e \rightarrow CO_2 + NO$  ;  $k_{22} = 1 \cdot 10^{-6} \cdot (T/300)^{0.5}$  ; [2]  
 R23.  $CO_2NO^+ + H_2O \rightarrow (H_2O)NO^+ + CO_2$  ;  $k_{23} = 1 \cdot 10^{-9} \cdot (T/300)^{0.5}$  ; [2]  
 R24.  $(H_2O)_2NO^+ + e \rightarrow NO + H_2O + H_2O$  ;  $k_{24} = 1 \cdot 10^{-6} \cdot (T/300)^{0.5}$  ; [2]  
 R25.  $(H_2O)_2NO^+ + H_2O + M \rightarrow (H_2O)_3NO^+ + M$  ;  $k_{25} = 1 \cdot 10^{-27} \cdot (T/300)^{0.5}$  ; [2]

- R26.  $(H_2O)_3NO^+ + e \rightarrow NO + H_2O + H_2O + H_2O$  ;  $k_{26} = 1 \cdot 10^{-6} \cdot (T/300)^{0.5}$  ; [2]
- R27.  $(H_2O)_3NO^+ + H_2O \rightarrow H_7O_3^+ + NO + OH$  ;  $k_{27} = 7 \cdot 10^{-11} \cdot (T/300)^{0.5}$  ; [2]
- R28.  $H_2O^+ + e \rightarrow H_2O$  ;  $k_{28} = 1 \cdot 10^{-6} \cdot (T/300)^{0.5}$  ; [1]
- R29.  $H_2O^+ + H_2O \rightarrow H_3O^+ + OH$  ;  $k_{29} = 10^{-9} \cdot (T/300)^{0.5}$  ; [3]
- R30.  $(H_2O)NO^+ + e \rightarrow NO + H_2O$  ;  $k_{30} = 1 \cdot 10^{-6} \cdot (T/300)^{0.5}$  ; [2]
- R31.  $(H_2O)NO^+ + H_2O + M \rightarrow (H_2O)_2NO^+ + M$  ;  $k_{31} = 1 \cdot 10^{-27} \cdot (T/300)^{0.5}$  ; [2]
- R32.  $H_3O^+(OH) + e \rightarrow H_2O + H_2O$  ;  $k_{32} = 1 \cdot 10^{-6} \cdot (T/300)^{0.5}$  ; [2]
- R33.  $H_3O^+(OH) + H_2O \rightarrow H_5O_2^+ + OH$  ;  $k_{33} = 1.2 \cdot 10^{-9} \cdot (T/300)^{0.5}$  ; [2]
- R34.  $H_2O^+ + O_2 \rightarrow O_2^+ + H_2O$  ;  $k_{34} = 2 \cdot 10^{-10} \cdot (T/300)^{0.5}$  ; [3]
- R35.  $H_3O^+ + e \rightarrow H + H_2O$  ;  $k_{35} = 1.3 \cdot 10^{-6} \cdot (T/300)^{0.5}$  ; [4]
- R36.  $H_3O^+ + H_2O + M \rightarrow H_5O_2^+ + M$  ;  $k_{36} = 3.4 \cdot 10^{-27} \cdot (T/300)^{0.5}$  ; [2]
- R37.  $H_5O_2^+ + e \rightarrow H + H_2O + H_2O$  ;  $k_{37} = 2.7 \cdot 10^{-6} \cdot (T/300)^{0.5}$  ; [4]
- R38.  $H_5O_2^+ + H_2O + M \rightarrow H_7O_3^+ + M$  ;  $k_{38} = 2.3 \cdot 10^{-27} \cdot (T/300)^{0.5}$  ; [2]
- R39.  $H_7O_3^+ + e \rightarrow H + H_2O + H_2O + H_2O$  ;  $k_{39} = 4.6 \cdot 10^{-6} \cdot (T/300)^{0.5}$  ; [4]
- R40.  $H_7O_3^+ + H_2O + M \rightarrow H_9O_4^+ + M$  ;  $k_{40} = 2.4 \cdot 10^{-27} \cdot (T/300)^{0.5}$  ; [2]
- R41.  $H_9O_4^+ + e \rightarrow H + H_2O + H_2O + H_2O + H_2O$  ;  $k_{41} = 7.5 \cdot 10^{-6} \cdot (T/300)^{0.5}$  ; [4]
- R42.  $O_2^+ + e + e \rightarrow O_2 + e$  ;  $k_{42} = 10^{-19} \cdot (300/T_e)^{4.5}$  ; [1]
- R43.  $O_2^+ + e + M \rightarrow O_2 + M$  ;  $k_{43} = 6 \cdot 10^{-27} \cdot (300/T_e)^{(3/2)}$  ; [1]
- R44.  $O_2^+ + e \rightarrow O + O$  ;  $k_{44} = 2 \cdot 10^{-7} \cdot (300/T_e)$  ; [1]
- R45.  $O_2^+ + H_2O + N_2 \rightarrow O_2^+(H_2O) + N_2$  ;  $k_{45} = 2.8 \cdot 10^{-28}$  ; [4]
- R46.  $O_2^+ + H_2O + O_2 \rightarrow O_2^+(H_2O) + O_2$  ;  $k_{46} = 1.9 \cdot 10^{-28}$  ; [4]
- R47.  $O_2^+ + N_2 + N_2 \rightarrow O_2^+N_2 + N_2$  ;  $k_{47} = 0.9 \cdot 10^{-30} \cdot (300/T)^2$  ; [1]
- R48.  $O_2^+ + N_2 \rightarrow NO + NO^+$  ;  $k_{48} = 1 \cdot 10^{-17} \cdot (T/300)^{0.5}$  ; [1]
- R49.  $O_2^+ + NO_2 \rightarrow O_3 + NO^+$  ;  $k_{49} = 1 \cdot 10^{-11} \cdot (T/300)^{0.5}$  ; [1]
- R50.  $O_2^+ + N \rightarrow O + NO^+$  ;  $k_{50} = 1.2 \cdot 10^{-10} \cdot (T/300)^{0.5}$  ; [2]
- R51.  $O_2^+ + NO \rightarrow O_2 + NO^+$  ;  $k_{51} = 4.4 \cdot 10^{-10} \cdot (T/300)^{0.5}$  ; [1]
- R52.  $O_2^+ + O_2 + O_2 \rightarrow O_4^+ + O_2$  ;  $k_{52} = 2.4 \cdot 10^{-30} \cdot (T/300)^{0.5}$  ; [1]
- R53.  $O_2^+(H_2O) + e \rightarrow O_2 + H_2O$  ;  $k_{53} = 1 \cdot 10^{-6} \cdot (T/300)^{0.5}$  ; [1]
- R54.  $O_2^+(H_2O) + H_2O \rightarrow H_3O^+(OH) + O_2$  ;  $k_{54} = 1.9 \cdot 10^{-9} \cdot (T/300)^{0.5}$  ; [1]
- R55.  $O_2^+(H_2O) + H_2O \rightarrow H_3O^+ + OH + O_2$  ;  $k_{55} = 2 \cdot 10^{-10} \cdot (T/300)^{0.5}$  ; [2]
- R56.  $O_2^+N_2 + O_2 \rightarrow O_4^+ + N_2$  ;  $k_{56} = 10^{-9} \cdot (T/300)^{0.5}$  ; [1]
- R57.  $O_2^+N_2 + e \rightarrow O_2 + N_2$  ;  $k_{57} = 1.3 \cdot 10^{-6} \cdot (300/T_e)^{(1/2)}$  ; [1]
- R58.  $N_2^+ + e + e \rightarrow e + N_2$  ;  $k_{58} = 10^{-19} \cdot (300/T_e)^{(9/2)}$  ; [1]
- R59.  $N_2^+ + e + M \rightarrow N_2 + M$  ;  $k_{59} = 6 \cdot 10^{-27} \cdot (300/T_e)^{(3/2)}$  ; [1]

- R60.  $N_2^+ + e \rightarrow N + N$  ;  $k_{60} = 4.8 \cdot 10^{-7} \cdot (300/T_e)^{(1/2)}$  ; [1]
- R61.  $N_2^+ + N_2 + N_2 \rightarrow N_2 + N_4^+$  ;  $k_{61} = 5 \cdot 10^{-29}$  ; [2]
- R62.  $N_2^+ + N + N_2 \rightarrow N_2 + N_3^+$  ;  $k_{62} = 0.9 \cdot 10^{-29} \cdot e^{400/T}$  ; [1]
- R63.  $N_2^+ + N \rightarrow N^+ + N_2$  ;  $k_{63} = 2.4 \cdot 10^{-15} \cdot T$  ; [1]
- R64.  $N_2^+ + NO \rightarrow NO^+ + N_2$  ;  $k_{64} = 3.3 \cdot 10^{-10} \cdot (T/300)^{0.5}$  ; [1]
- R65.  $N_2^+ + O_2 \rightarrow O_2^+ + N_2$  ;  $k_{65} = 6 \cdot 10^{-11} \cdot (300/T)^{0.5}$  ; [1]
- R66.  $N_2^+ + O_3 \rightarrow O_2^+ + O + N_2$  ;  $k_{66} = 1 \cdot 10^{-10} \cdot (T/300)^{0.5}$  ; [1]
- R67.  $N_2^+ + O \rightarrow NO^+ + N$  ;  $k_{67} = 1.3 \cdot 10^{-10} \cdot (300/T)^{0.5}$  ; [1]
- R68.  $N_2^+ + O \rightarrow O^+ + N_2$  ;  $k_{68} = 1 \cdot 10^{-11} \cdot (300/T)^{0.2}$  ; [1]
- R69.  $N_3^+ + e \rightarrow N_2 + N$  ;  $k_{69} = 2 \cdot 10^{-7} \cdot (300/T_e)^{(1/2)}$  ; [1]
- R70.  $N_3^+ + NO_2 \rightarrow NO^+ + NO + N_2$  ;  $k_{70} = 7 \cdot 10^{-11} \cdot (T/300)^{0.5}$  ; [1]
- R71.  $N_3^+ + O_2 \rightarrow O_2^+ + N + N_2$  ;  $k_{71} = 2.3 \cdot 10^{-11} \cdot (T/300)^{0.5}$  ; [1]
- R72.  $N_4^+ + e \rightarrow N_2 + N_2$  ;  $k_{72} = 2 \cdot 10^{-6} \cdot (300/T_e)^{(1/2)}$  ; [1]
- R73.  $N_4^+ + N \rightarrow N^+ + N_2 + N_2$  ;  $k_{73} = 10^{-11} \cdot (T/300)^{0.5}$  ; [1]
- R74.  $N_4^+ + NO \rightarrow NO^+ + N_2 + N_2$  ;  $k_{74} = 4 \cdot 10^{-10} \cdot (T/300)^{0.5}$  ; [1]
- R75.  $N_4^+ + O_2 \rightarrow O_2^+ + N_2 + N_2$  ;  $k_{75} = 2.5 \cdot 10^{-10} \cdot (T/300)^{0.5}$  ; [3]
- R76.  $N_4^+ + O \rightarrow O^+ + N_2 + N_2$  ;  $k_{76} = 2.5 \cdot 10^{-10} \cdot (T/300)^{0.5}$  ; [1]
- R77.  $N^+ + O \rightarrow O^+ + N$  ;  $k_{77} = 1 \cdot 10^{-12} \cdot (T/300)^{0.5}$  ; [1]
- R78.  $N^+ + e + e \rightarrow e + N$  ;  $k_{78} = 10^{-19} \cdot (300/T_e)^{(9/2)}$  ; [1]
- R79.  $N^+ + e + M \rightarrow N + M$  ;  $k_{79} = 6 \cdot 10^{-27} \cdot (300/T_e)^{(3/2)}$  ; [1]
- R80.  $N^+ + N_2 + N_2 \rightarrow N_2 + N_3^+$  ;  $k_{80} = 0.9 \cdot 10^{-29} \cdot e^{400/T}$  ; [1]
- R81.  $N^+ + N + M \rightarrow N_2^+ + M$  ;  $k_{81} = 10^{-29} \cdot (T/300)^{0.5}$  ; [1]
- R82.  $N^+ + NO \rightarrow N_2 + O^+$  ;  $k_{82} = 1 \cdot 10^{-12} \cdot (T/300)^{0.5}$  ; [1]
- R83.  $N^+ + NO \rightarrow N_2^+ + O$  ;  $k_{83} = 3 \cdot 10^{-12} \cdot (T/300)^{0.5}$  ; [1]
- R84.  $N^+ + NO \rightarrow NO^+ + N$  ;  $k_{84} = 8 \cdot 10^{-10} \cdot (T/300)^{0.5}$  ; [1]
- R85.  $N^+ + O + M \rightarrow NO^+ + M$  ;  $k_{85} = 10^{-29} \cdot (T/300)^{0.5}$  ; [1]
- R86.  $N^+ + O_2 \rightarrow N + O_2^+$  ;  $k_{86} = 2.8 \cdot 10^{-10} \cdot (T/300)^{0.5}$  ; [2]
- R87.  $N^+ + O_2 \rightarrow NO^+ + O$  ;  $k_{87} = 2.5 \cdot 10^{-10} \cdot (T/300)^{0.5}$  ; [1]
- R88.  $N^+ + O_2 \rightarrow O^+ + NO$  ;  $k_{88} = 2.8 \cdot 10^{-11} \cdot (T/300)^{0.5}$  ; [1]
- R89.  $N^+ + O_3 \rightarrow NO^+ + O_2$  ;  $k_{89} = 5 \cdot 10^{-10} \cdot (T/300)^{0.5}$  ; [1]
- R90.  $NO^+ + CO_2 + M \rightarrow CO_2NO^+ + M$  ;  $k_{90} = 7 \cdot 10^{-30} \cdot (T/300)^{0.5}$  ; [2]
- R91.  $NO^+ + e + e \rightarrow NO + e$  ;  $k_{91} = 10^{-19} \cdot (300/T_e)^{4.5}$  ; [1]
- R92.  $NO^+ + e + M \rightarrow NO + M$  ;  $k_{92} = 6 \cdot 10^{-27} \cdot (300/T_e)^{(3/2)}$  ; [1]
- R93.  $NO^+ + e \rightarrow N + O$  ;  $k_{93} = 4 \cdot 10^{-7} \cdot (300/T_e)^{1.5}$  ; [1]

- R94.  $NO^+ + H_2O + M \rightarrow (H_2O)NO^+ + M$  ;  $k_{94} = 1.8 \cdot 10^{-28}$  ; [2]  
R95.  $NO^+ + NO_2^- \rightarrow NO_2 + NO$  ;  $k_{95} = 1.7 \cdot 10^{-7} \cdot (T/300)^{0.5}$  ; [1]  
R96.  $NO^+ + NO_3^- \rightarrow NO_3 + NO$  ;  $k_{96} = 3.4 \cdot 10^{-8} \cdot (T/300)^{0.5}$  ; [1]  
R97.  $NO^+ + O_2 + N_2 \rightarrow NO^+O_2 + N_2$  ;  $k_{97} = 3 \cdot 10^{-31} \cdot (T/300)^{0.5}$  ; [1]  
R98.  $NO^+ + O_2 + O_2 \rightarrow NO^+O_2 + O_2$  ;  $k_{98} = 0.9 \cdot 10^{-31} \cdot (T/300)^{0.5}$  ; [1]  
R99.  $NO^+ + N_2 + N_2 \rightarrow NO^+N_2 + N_2$  ;  $k_{99} = 2 \cdot 10^{-31} \cdot (300/T)^{4.4}$  ; [1]  
R100.  $NO^+N_2 + e \rightarrow NO + N_2$  ;  $k_{100} = 1.3 \cdot 10^{-6} \cdot (300/T_e)^{(1/2)}$  ; [1]  
R101.  $NO^+N_2 + H_2O \rightarrow (H_2O)NO^+ + N_2$  ;  $k_{101} = 1 \cdot 10^{-9} \cdot (T/300)^{0.5}$  ; [1]  
R102.  $NO^+N_2 + O_2 \rightarrow NO^+ + N_2 + O_2$  ;  $k_{102} = 10^{-9} \cdot (T/300)^{0.5}$  ; [1]  
R103.  $NO^+O_2 + e \rightarrow NO + O_2$  ;  $k_{103} = 1.3 \cdot 10^{-6} \cdot (300/T_e)^{(1/2)}$  ; [1]  
R104.  $NO^+O_2 + O_2 \rightarrow NO^+ + O_2 + O_2$  ;  $k_{104} = 10^{-9} \cdot (T/300)^{0.5}$  ; [1]  
R105.  $O^+ + N_2 + M \rightarrow NO^+ + N + M$  ;  $k_{105} = 6 \cdot 10^{-29} \cdot (300/T)^2$  ; [1]  
R106.  $O^+ + N_2 \rightarrow NO^+ + N$  ;  $k_{106} = 3 \cdot 10^{-12} \cdot e^{-0.00311 \cdot T}$  ; [1]  
R107.  $O^+ + NO \rightarrow NO^+ + O$  ;  $k_{107} = 2.4 \cdot 10^{-11} \cdot (T/300)^{0.5}$  ; [1]  
R108.  $O^+ + NO \rightarrow O_2^+ + N$  ;  $k_{108} = 3 \cdot 10^{-12} \cdot (T/300)^{0.5}$  ; [1]  
R109.  $O^+ + O_2 \rightarrow O + O_2^+$  ;  $k_{109} = 3.3 \cdot 10^{-11} \cdot e^{-0.00169 \cdot T}$  ; [1]  
R110.  $O^+ + O_3 \rightarrow O_2 + O_2^+$  ;  $k_{110} = 1 \cdot 10^{-10} \cdot (T/300)^{0.5}$  ; [1]  
R111.  $O^+ + O + M \rightarrow O_2^+ + M$  ;  $k_{111} = 1 \cdot 10^{-29} \cdot (T/300)^{0.5}$  ; [1]  
R112.  $O^+ + N + M \rightarrow NO^+ + M$  ;  $k_{112} = 1 \cdot 10^{-29} \cdot (T/300)^{0.5}$  ; [1]  
R113.  $O^+ + e + e \rightarrow e + O$  ;  $k_{113} = 10^{-19} \cdot (300/T_e)^{(9/2)}$  ; [1]  
R114.  $O^+ + e + M \rightarrow O + M$  ;  $k_{114} = 6 \cdot 10^{-27} \cdot (300/T_e)^{(3/2)}$  ; [1]  
R115.  $O_4^+ + e \rightarrow O_2 + O_2$  ;  $k_{115} = 1.4 \cdot 10^{-6} \cdot (300/T_e)^{0.5}$  ; [1]  
R116.  $O_4^+ + H_2O \rightarrow O_2^+(H_2O) + O_2$  ;  $k_{116} = 2 \cdot 10^{-9} \cdot (T/300)^{0.5}$  ; [2]  
R117.  $O_4^+ + NO \rightarrow NO^+ + O_2 + O_2$  ;  $k_{117} = 10^{-10} \cdot (T/300)^{0.5}$  ; [1]  
R118.  $O_4^+ + O \rightarrow O_2^+ + O_3$  ;  $k_{118} = 3 \cdot 10^{-10} \cdot (T/300)^{0.5}$  ; [2]

Negative ion chemistry:

- R119.  $CO_3^- + NO \rightarrow NO_2^- + CO_2$  ;  $k_{119} = 1.1 \cdot 10^{-11} \cdot (T/300)^{0.5}$  ; [2]  
R120.  $CO_3^- + O \rightarrow O_2^- + CO_2$  ;  $k_{120} = 1.1 \cdot 10^{-9} \cdot (T/300)^{0.5}$  ; [2]  
R121.  $CO_4^- + NO \rightarrow NO_3^- + CO_2$  ;  $k_{121} = 4.8 \cdot 10^{-11} \cdot (T/300)^{0.5}$  ; [4]  
R122.  $CO_4^- + O \rightarrow CO_3^- + O_2$  ;  $k_{122} = 1.5 \cdot 10^{-10} \cdot (T/300)^{0.5}$  ; [4]  
R123.  $NO_2^- + H \rightarrow OH^- + NO$  ;  $k_{123} = 3 \cdot 10^{-10} \cdot (T/300)^{0.5}$  ; [2]  
R124.  $NO_2^- + NO_2 \rightarrow NO_3^- + NO$  ;  $k_{124} = 4 \cdot 10^{-12} \cdot (T/300)^{0.5}$  ; [1]  
R125.  $NO_2^- + NO_3 \rightarrow NO_2 + NO_3^-$  ;  $k_{125} = 5 \cdot 10^{-10} \cdot (T/300)^{0.5}$  ; [1]  
R126.  $NO_2^- + O_3 \rightarrow NO_3^- + O_2$  ;  $k_{126} = 1.8 \cdot 10^{-11} \cdot (T/300)^{0.5}$  ; [1]

- R127.  $NO_2^- + O \rightarrow NO_3 + e$  ;  $k_{127} = 10^{-12} \cdot (T/300)^{0.5}$  ; [1]
- R128.  $NO_3^- + NO \rightarrow NO_2^- + NO_2$  ;  $k_{128} = 3 \cdot 10^{-15} \cdot (T/300)^{0.5}$  ; [1]
- R129.  $OH^- + H \rightarrow H_2O + e$  ;  $k_{129} = 1 \cdot 10^{-9} \cdot (T/300)^{0.5}$  ; [4]
- R130.  $OH^- + O \rightarrow HO_2 + e$  ;  $k_{130} = 4 \cdot 10^{-10} \cdot (T/300)^{0.5}$  ; [2]
- R131.  $O^- + N \rightarrow NO + e$  ;  $k_{131} = 2.6 \cdot 10^{-10} \cdot (T/300)^{0.5}$  ; [1]
- R132.  $O^- + NO_2 \rightarrow NO_2^- + O$  ;  $k_{132} = 1.2 \cdot 10^{-9} \cdot (T/300)^{0.5}$  ; [1]
- R133.  $O^- + NO + M \rightarrow NO_2^- + M$  ;  $k_{133} = 10^{-29} \cdot (T/300)^{0.5}$  ; [1]
- R134.  $O^- + NO \rightarrow NO_2 + e$  ;  $k_{134} = 2.6 \cdot 10^{-10} \cdot (T/300)^{0.5}$  ; [1]
- R135.  $O^- + O_2 + M \rightarrow O_3^- + M$  ;  $k_{135} = 1.1 \cdot 10^{-30} \cdot (300/T)$  ; [1]
- R136.  $O^- + O_2 \rightarrow O_2^- + O$  ;  $k_{136} = 10^{-10} \cdot (T/300)^{0.5}$  ; [1]
- R137.  $O^- + O_2 \rightarrow O_3 + e$  ;  $k_{137} = 5 \cdot 10^{-15} \cdot (T/300)^{0.5}$  ; [1]
- R138.  $O^- + O_3 \rightarrow O + O_3^-$  ;  $k_{138} = 8 \cdot 10^{-10} \cdot (T/300)^{0.5}$  ; [2]
- R139.  $O^- + O \rightarrow O_2 + e$  ;  $k_{139} = 5 \cdot 10^{-10} \cdot (T/300)^{0.5}$  ; [1]
- R140.  $O_2^- + N_2 \rightarrow O_2 + N_2 + e$  ;  $k_{140} = 1.9 \cdot 10^{-12} \cdot (T/300)^{0.5} \cdot e^{-4990/T}$  ; [1]
- R141.  $O_2^- + N \rightarrow NO_2 + e$  ;  $k_{141} = 5 \cdot 10^{-10} \cdot (T/300)^{0.5}$  ; [1]
- R142.  $O_2^- + NO_2 \rightarrow NO_2^- + O_2$  ;  $k_{142} = 8 \cdot 10^{-10} \cdot (T/300)^{0.5}$  ; [1]
- R143.  $O_2^- + NO_3 \rightarrow O_2 + NO_3^-$  ;  $k_{143} = 5 \cdot 10^{-10} \cdot (T/300)^{0.5}$  ; [1]
- R144.  $O_2^- + O_2(a) \rightarrow O_2 + O_2 + e$  ;  $k_{144} = 2 \cdot 10^{-10} \cdot (T/300)^{0.5}$  ; [3]
- R145.  $O_2^- + O_2 \rightarrow O_2 + O_2 + e$  ;  $k_{145} = 2.7 \cdot 10^{-10} \cdot (T/300)^{0.5} \cdot e^{-5990/T}$  ; [3]
- R146.  $O_2^- + O_2 + O_2 \rightarrow O_4^- + O_2$  ;  $k_{146} = 4 \cdot 10^{-31} \cdot (T/300)^{0.5}$  ; [3]
- R147.  $O_2^- + O_3 \rightarrow O_3^- + O_2$  ;  $k_{147} = 3.5 \cdot 10^{-10} \cdot (T/300)^{0.5}$  ; [1]
- R148.  $O_2^- + O \rightarrow O_2 + O^-$  ;  $k_{148} = 3.3 \cdot 10^{-10} \cdot (T/300)^{0.5}$  ; [1]
- R149.  $O_2^- + O \rightarrow O_3 + e$  ;  $k_{149} = 2.5 \cdot 10^{-10} \cdot (T/300)^{0.5}$  ; [1]
- R150.  $O_3^- + CO_2 \rightarrow CO_3^- + O_2$  ;  $k_{150} = 4 \cdot 10^{-10} \cdot (T/300)^{0.5}$  ; [2]
- R151.  $O_3^- + NO_2 \rightarrow O_2 + NO_3^-$  ;  $k_{151} = 2 \cdot 10^{-11} \cdot (T/300)^{0.5}$  ; [1]
- R152.  $O_3^- + NO_2 \rightarrow O_3 + NO_2^-$  ;  $k_{152} = 7 \cdot 10^{-10} \cdot (T/300)^{0.5}$  ; [1]
- R153.  $O_3^- + NO_3 \rightarrow O_3 + NO_3^-$  ;  $k_{153} = 5 \cdot 10^{-10} \cdot (T/300)^{0.5}$  ; [1]
- R154.  $O_3^- + NO \rightarrow NO_2^- + O_2$  ;  $k_{154} = 2.6 \cdot 10^{-12} \cdot (T/300)^{0.5}$  ; [1]
- R155.  $O_3^- + NO \rightarrow NO_3^- + O$  ;  $k_{155} = 1 \cdot 10^{-11} \cdot (T/300)^{0.5}$  ; [1]
- R156.  $O_3^- + O \rightarrow O_2^- + O_2$  ;  $k_{156} = 1 \cdot 10^{-10} \cdot (T/300)^{0.5}$  ; [1]
- R157.  $O_3^- + O \rightarrow O_2 + O_2 + e$  ;  $k_{157} = 3 \cdot 10^{-10} \cdot (T/300)^{0.5}$  ; [1]
- R158.  $O_4^- + CO_2 \rightarrow CO_4^- + O_2$  ;  $k_{158} = 4.3 \cdot 10^{-10} \cdot (T/300)^{0.5}$  ; [2]
- R159.  $O_4^- + M \rightarrow O_2^- + O_2 + M$  ;  $k_{159} = 10^{-10} \cdot e^{-1044/T}$  ; [1]
- R160.  $O_4^- + NO \rightarrow NO_3^- + O_2$  ;  $k_{160} = 2.5 \cdot 10^{-10} \cdot (T/300)^{0.5}$  ; [1]

- R161.  $O_4^- + O_2 \rightarrow O_2^- + O_2 + O_2$  ;  $k_{161} = 2.4 \cdot 10^{-14} \cdot (T/300)^{0.5}$  ; [1]  
R162.  $O_4^- + O \rightarrow O_3^- + O_2$  ;  $k_{162} = 4 \cdot 10^{-10} \cdot (T/300)^{0.5}$  ; [1]  
R163.  $O_4^- + O \rightarrow O^- + O_2 + O_2$  ;  $k_{163} = 3 \cdot 10^{-10} \cdot (T/300)^{0.5}$  ; [1]  
R164.  $e + N_2 + O_2 \rightarrow N_2 + O_2^-$  ;  $k_{164} = 1.07 \cdot 10^{-31} \cdot (300/T_e)^2 \cdot e^{-70/T} \cdot e^{1500 \cdot (T_e - T)/(T_e \cdot T)}$  ; [1]  
R165.  $e + O_2 + O_3 \rightarrow O_2 + O_3^-$  ;  $k_{165} = 10^{-31}$  ; [1]  
R166.  $e + O_2 + O \rightarrow O_2^- + O$  ;  $k_{166} = 1.5 \cdot 10^{-31} \cdot (T/300)^{0.5}$  ; [1]  
R167.  $e + O_2 + O \rightarrow O^- + O_2$  ;  $k_{167} = 1.5 \cdot 10^{-31} \cdot (T/300)^{0.5}$  ; [1]  
R168.  $e + O_3 \rightarrow O_2 + O^-$  ;  $k_{168} = 10^{-11} \cdot (T/300)^{0.5}$  ; [1]  
R169.  $e + O_3 \rightarrow O_2^- + O$  ;  $k_{169} = 10^{-9} \cdot (T/300)^{0.5}$  ; [1]  
R170.  $e + O_2 + O_2 \rightarrow O_2 + O_2^-$  ;  $k_{170} = 1.4 \cdot 10^{-29} \cdot (300/T_e) \cdot e^{-600/T} \cdot e^{700 \cdot (T_e - T)/(T_e \cdot T)}$  ; [1]

Ground state chemistry:

- R171.  $H + HO_2 \rightarrow O_2 + H_2$  ;  $k_{171} = 5.6 \cdot 10^{-12} \cdot (T/300)^{0.5}$  ; [3]  
R172.  $H + HO_2 \rightarrow OH + OH$  ;  $k_{172} = 7.3 \cdot 10^{-11} \cdot (T/300)^{0.5}$  ; [3]  
R173.  $H + O_3 \rightarrow O_2 + OH$  ;  $k_{173} = 1.4 \cdot 10^{-10} \cdot e^{-470/T}$  ; [3]  
R174.  $HO_2 + HO_2 \rightarrow O_2 + H_2O_2$  ;  $k_{174} = 2.3 \cdot 10^{-13} \cdot e^{590/T}$  ; [2]  
R175.  $N + N + M \rightarrow N_2 + M$  ;  $k_{175} = 8.27 \cdot 10^{-34} \cdot e^{500/T}$  ; [1]  
R176.  $N + NO_2 \rightarrow N_2 + O_2$  ;  $k_{176} = 7 \cdot 10^{-13} \cdot (T/300)^{0.5}$  ; [2]  
R177.  $N + NO_2 \rightarrow N_2 + O + O$  ;  $k_{177} = 9.1 \cdot 10^{-13} \cdot (T/300)^{0.5}$  ; [2]  
R178.  $N + NO_2 \rightarrow NO + NO$  ;  $k_{178} = 2.3 \cdot 10^{-12} \cdot (T/300)^{0.5}$  ; [2]  
R179.  $N + NO \rightarrow N_2 + O$  ;  $k_{179} = 1.05 \cdot 10^{-12} \cdot T^{0.5} \cdot (T/300)^{0.5}$  ; [1]  
R180.  $N + O_3 \rightarrow NO + O_2$  ;  $k_{180} = 2 \cdot 10^{-16} \cdot (T/300)^{0.5}$  ; [2]  
R181.  $N + O + M \rightarrow NO + M$  ;  $k_{181} = 1.76 \cdot 10^{-31} \cdot T^{(-0.5)}$  ; [1]  
R182.  $N + O_2 \rightarrow NO + O$  ;  $k_{182} = 4.5 \cdot 10^{-12} \cdot e^{-3220/T}$  ; [1]  
R183.  $NO + NO_3 \rightarrow NO_2 + NO_2$  ;  $k_{183} = 1.7 \cdot 10^{-11} \cdot (T/300)^{0.5}$  ; [1]  
R184.  $NO + O_3 \rightarrow O_2 + NO_2$  ;  $k_{184} = 4.3 \cdot 10^{-12} \cdot e^{-1560/T}$  ; [1]  
R185.  $NO_2 + NO_3 \rightarrow O_2 + NO + NO_2$  ;  $k_{185} = 2.3 \cdot 10^{-13} \cdot e^{-1600/T}$  ; [1]  
R186.  $NO_2 + O_3 \rightarrow O_2 + NO_3$  ;  $k_{186} = 1.2 \cdot 10^{-13} \cdot e^{-2450/T}$  ; [1]  
R187.  $NO_3 + NO_3 \rightarrow O_2 + NO_2 + NO_2$  ;  $k_{187} = 5 \cdot 10^{-12} \cdot e^{-3000/T}$  ; [1]  
R188.  $O_2 + H + M \rightarrow HO_2 + M$  ;  $k_{188} = 5.94 \cdot 10^{-32} \cdot (300/T)$  ; [3]  
R189.  $O_2 + H + M \rightarrow HO_2 + M$  ;  $k_{189} = 5.94 \cdot 10^{-32} \cdot (300/T)$  ; [3]  
R190.  $O + HO_2 \rightarrow O_2 + OH$  ;  $k_{190} = 3 \cdot 10^{-11} \cdot e^{200/T}$  ; [2]  
R191.  $O + N_2 + O_2 \rightarrow O_3 + N_2$  ;  $k_{191} = 6.2 \cdot 10^{-34} \cdot (T/300)^{0.5}$  ; [1]  
R192.  $O + NO_2 \rightarrow NO + O_2$  ;  $k_{192} = 1.13 \cdot 10^{-11} \cdot (T/1000)^{0.18}$  ; [2]  
R193.  $O + NO_3 \rightarrow O_2 + NO_2$  ;  $k_{193} = 10^{-11} \cdot (T/300)^{0.5}$  ; [1]  
R194.  $O + O_2 + O_2 \rightarrow O_3 + O_2$  ;  $k_{194} = 6.9 \cdot 10^{-34} \cdot (T/300)^{0.5}$  ; [1]

- R195.  $O + O_3 \rightarrow O_2 + O_2$  ;  $k_{195} = 8 \cdot 10^{-12} \cdot e^{-2060/T}$  ; [1]  
R196.  $O + OH + M \rightarrow HO_2 + M$  ;  $k_{196} = 1 \cdot 10^{-32} \cdot (T/300)^{0.5}$  ; [1]  
R197.  $O + OH \rightarrow O_2 + H$  ;  $k_{197} = 2.2 \cdot 10^{-11} \cdot e^{117/T}$  ; [2]  
R198.  $O + O + M \rightarrow O_2 + M$  ;  $k_{198} = 1.9 \cdot 10^{-30} \cdot e^{-170/T}/T + 2.4 \cdot 10^{-33} \cdot (300/T)^2$  ; [1]  
R199.  $OH + H + N_2 \rightarrow H_2O + N_2$  ;  $k_{199} = 6.88 \cdot 10^{-31} \cdot (T/300)^2$  ; [3]  
R200.  $OH + H + O_2 \rightarrow H_2O + O_2$  ;  $k_{200} = 6.88 \cdot 10^{-31} \cdot (T/300)^2$  ; [3]  
R201.  $OH + HO_2 \rightarrow O_2 + H_2O$  ;  $k_{201} = 1.7 \cdot 10^{-11} \cdot e^{250/T}$  ; [2]  
R202.  $OH + O_3 \rightarrow O_2 + HO_2$  ;  $k_{202} = 1.6 \cdot 10^{-12} \cdot e^{-940/T}$  ; [2]  
R203.  $OH + OH \rightarrow O + H_2O$  ;  $k_{203} = 4.2 \cdot 10^{-12} \cdot e^{-240/T}$  ; [3]

Active state chemistry:

- R204.  $O_2(a) + N_2 \rightarrow O_2 + N_2$  ;  $k_{204} = 3 \cdot 10^{-21} \cdot (T/300)^{0.5}$  ; [1]  
R205.  $O_2(a) + O_2 \rightarrow O_2 + O_2$  ;  $k_{205} = 2.2 \cdot (T/300)^{0.8} \cdot 10^{-18}$  ; [1]  
R206.  $O_2(a) + O \rightarrow O_2 + O$  ;  $k_{206} = 7 \cdot 10^{-16} \cdot (T/300)^{0.5}$  ; [2]  
R207.  $O_2(a) + NO \rightarrow O_2 + NO$  ;  $k_{207} = 2.46 \cdot 10^{-17} \cdot (T/300)^{0.5}$  ; [2]  
R208.  $O_2(a) + O_3 \rightarrow O_2 + O_2 + O$  ;  $k_{208} = 1.7 \cdot 10^{-13} \cdot e^{-1564/T}$  ; [1]  
R209.  $O_2(a) + N \rightarrow NO + O$  ;  $k_{209} = 2 \cdot 10^{-15} \cdot e^{-600/T}$  ; [2]  
R210.  $O_2(a) + O_3 \rightarrow O_2 + O_2 + O(^1D)$  ;  $k_{210} = 5.2 \cdot 10^{-11} \cdot e^{-2840/T}$  ; [2]  
R211.  $O_2(a) + O_2(a) + O_2 \rightarrow O_3 + O_3$  ;  $k_{211} = 1 \cdot 10^{-31} \cdot (T/300)^{0.5}$  ; [2]  
R212.  $O_2(a) \rightarrow O_2 + h\nu(O_2IRAtm)$  ;  $k_{212} = 2.22 \cdot 10^{-4}$  ; [2]  
R213.  $O_2(b) \rightarrow O_2 + h\nu(O_2Atm)$  ;  $k_{213} = 7.7 \cdot 10^{-2}$  ; [2]  
R214.  $O_2(b) + N_2 \rightarrow O_2(a) + N_2$  ;  $k_{214} = 4.9 \cdot 10^{-15} \cdot e^{-253/T}$  ; [1]  
R215.  $O_2(b) + O_2 \rightarrow O_2(a) + O_2$  ;  $k_{215} = 1.63 \cdot 10^{-22} \cdot e^{-253/T} \cdot (T/300)^{2.4}$  ; [2]  
R216.  $O_2(b) + O \rightarrow O_2(a) + O$  ;  $k_{216} = 8 \cdot 10^{-14} \cdot (T/300)^{0.5}$  ; [2]  
R217.  $O_2(b) + NO \rightarrow O_2(a) + NO$  ;  $k_{217} = 4 \cdot 10^{-14} \cdot (T/300)^{0.5}$  ; [2]  
R218.  $O_2(b) + O_3 \rightarrow O_2 + O_2 + O$  ;  $k_{218} = 1.8 \cdot 10^{-11} \cdot (T/300)^{0.5}$  ; [2]  
R219.  $N_2(A) + O \rightarrow NO + N(^2D)$  ;  $k_{219} = 7 \cdot 10^{-12} \cdot (T/300)^{0.5}$  ; [2]  
R220.  $N_2(A) + O_2 \rightarrow N_2O + O$  ;  $k_{220} = 7.8 \cdot 10^{-14} \cdot (T/300)^{0.5}$  ; [2]  
R221.  $N_2(A) + O_2 \rightarrow N_2 + O + O$  ;  $k_{221} = 1.63 \cdot 10^{-12} \cdot (T/300)^{0.55}$  ; [2]  
R222.  $N_2(A) + N_2O \rightarrow NO + N_2 + N$  ;  $k_{222} = 1 \cdot 10^{-11} \cdot (T/300)^{0.5}$  ; [2]  
R223.  $N_2(A) + O_2 \rightarrow N_2 + O_2$  ;  $k_{223} = 2.54 \cdot 10^{-12} \cdot (T/300)^{0.5}$  ; [2]  
R224.  $N_2(A) + N_2 \rightarrow N_2 + N_2$  ;  $k_{224} = 3 \cdot 10^{-18} \cdot (T/300)^{0.5}$  ; [2]  
R225.  $N_2(A) + O_2 \rightarrow N_2 + O_2(a)$  ;  $k_{225} = 1.29 \cdot 10^{-12} \cdot (T/300)^{0.5}$  ; [2]  
R226.  $N_2(A) + O_2 \rightarrow N_2 + O_2(b)$  ;  $k_{226} = 1.29 \cdot 10^{-12} \cdot (T/300)^{0.5}$  ; [2]  
R227.  $N_2(A) + O_2(a) \rightarrow N_2(B) + O_2$  ;  $k_{227} = 1 \cdot 10^{-10} \cdot (T/300)^{0.5}$  ; [2]  
R228.  $N_2(A) + N_2(A) \rightarrow N_2 + N_2(B)$  ;  $k_{228} = 3 \cdot 10^{-10} \cdot (T/300)^{0.5}$  ; [2]

- R229.  $N_2(A) + N_2(A) \rightarrow N_2 + N_2(C)$  ;  $k_{229} = 1.5 \cdot 10^{-10} \cdot (T/300)^{0.5}$  ; [2]
- R230.  $N_2(A) + O \rightarrow N_2 + O(^1S)$  ;  $k_{230} = 2 \cdot 10^{-11} \cdot (T/300)^{0.5}$  ; [2]
- R231.  $N_2(A) + NO \rightarrow N_2 + NO$  ;  $k_{231} = 7 \cdot 10^{-11} \cdot (T/300)^{0.5}$  ; [2]
- R232.  $N_2(B) + N_2 \rightarrow N_2(A) + N_2$  ;  $k_{232} = 5 \cdot 10^{-11} \cdot (T/300)^{0.5}$  ; [2]
- R233.  $N_2(B) \rightarrow N_2(A) + h\nu(1PN_2)$  ;  $k_{233} = 1.5 \cdot 10^5$  ; [1]
- R234.  $N_2(B) + NO \rightarrow N_2(A) + NO$  ;  $k_{234} = 2.4 \cdot 10^{-10} \cdot (T/300)^{0.5}$  ; [2]
- R235.  $N_2(B) + O_2 \rightarrow N_2 + O + O$  ;  $k_{235} = 3 \cdot 10^{-10} \cdot (T/300)^{0.5}$  ; [2]
- R236.  $N_2(C) \rightarrow N_2(B) + h\nu(2PN_2)$  ;  $k_{236} = 3 \cdot 10^7$  ; [2]
- R237.  $N_2(C) + O_2 \rightarrow N_2 + O(^1S) + O$  ;  $k_{237} = 3 \cdot 10^{-10} \cdot (T/300)^{0.5}$  ; [2]
- R238.  $N(^2D) + N_2O \rightarrow NO + N_2$  ;  $k_{238} = 3 \cdot 10^{-12} \cdot (T/300)^{0.5}$  ; [2]
- R239.  $N(^2D) + O_2 \rightarrow NO + O$  ;  $k_{239} = 1.5 \cdot 10^{-12} \cdot (T/300)^{0.5}$  ; [2]
- R240.  $N(^2D) + O_2 \rightarrow NO + O(^1D)$  ;  $k_{240} = 6 \cdot 10^{-12} \cdot (T/300)^{0.5}$  ; [2]
- R241.  $N(^2D) + NO \rightarrow N_2 + O$  ;  $k_{241} = 6 \cdot 10^{-11} \cdot (T/300)^{0.5}$  ; [1]
- R242.  $N(^2D) + N_2 \rightarrow N + N_2$  ;  $k_{242} = 6 \cdot 10^{-15} \cdot (T/300)^{0.5}$  ; [2]
- R243.  $N(^2D) + O \rightarrow N + O(^1D)$  ;  $k_{243} = 4 \cdot 10^{-13} \cdot (T/300)^{0.5}$  ; [2]
- R244.  $O(^1D) + N_2O \rightarrow NO + NO$  ;  $k_{244} = 7.2 \cdot 10^{-11} \cdot (T/300)^{0.5}$  ; [2]
- R245.  $O(^1D) + N_2O \rightarrow N_2 + O_2$  ;  $k_{245} = 4.4 \cdot 10^{-11} \cdot (T/300)^{0.5}$  ; [2]
- R246.  $O(^1D) + O_2 \rightarrow O + O_2(b)$  ;  $k_{246} = 2.6 \cdot 10^{-11} \cdot e^{67/T}$  ; [1]
- R247.  $O(^1D) + N_2 \rightarrow O + N_2$  ;  $k_{247} = 1.8 \cdot 10^{-11} \cdot e^{107/T}$  ; [1]
- R248.  $O(^1D) + O_2 \rightarrow O + O_2$  ;  $k_{248} = 6.4 \cdot 10^{-12} \cdot e^{67/T}$  ; [1]
- R249.  $O(^1D) + O_3 \rightarrow O + O_2 + O$  ;  $k_{249} = 1.2 \cdot 10^{-10} \cdot (T/300)^{0.5}$  ; [2]
- R250.  $O(^1D) + O_3 \rightarrow O_2 + O_2$  ;  $k_{250} = 1.2 \cdot 10^{-10} \cdot (T/300)^{0.5}$  ; [2]
- R251.  $O(^1D) + NO \rightarrow N + O_2$  ;  $k_{251} = 1.7 \cdot 10^{-10} \cdot (T/300)^{0.5}$  ; [2]
- R252.  $O(^1D) \rightarrow O + h\nu(630nm)$  ;  $k_{252} = 9.1 \cdot 10^{-03}$  ; [2]
- R253.  $O(^1S) \rightarrow O(^1D) + h\nu(557nm)$  ;  $k_{253} = 1.43$  ; [1]
- R254.  $O(^1S) + N_2 \rightarrow O + N_2$  ;  $k_{254} = 5 \cdot 10^{-17} \cdot (T/300)^{0.5}$  ; [2]
- R255.  $O(^1S) + O_2 \rightarrow O(^1D) + O_2$  ;  $k_{255} = 4.3 \cdot 10^{-12} \cdot e^{-850/T}$  ; [1]
- R256.  $O(^1S) + O_3 \rightarrow O(^1D) + O_2 + O$  ;  $k_{256} = 5.8 \cdot 10^{-10} \cdot (T/300)^{0.5}$  ; [2]
- R257.  $O(^1S) + O_3 \rightarrow O_2 + O_2$  ;  $k_{257} = 5.8 \cdot 10^{-10} \cdot (T/300)^{0.5}$  ; [2]
- R258.  $O(^1S) + NO \rightarrow O + NO$  ;  $k_{258} = 1.8 \cdot 10^{-10} \cdot (T/300)^{0.5}$  ; [2]
- R259.  $O(^1S) + NO \rightarrow O(^1D) + NO$  ;  $k_{259} = 3.2 \cdot 10^{-10} \cdot (T/300)^{0.5}$  ; [2]
- R260.  $O(^1S) + N_2O \rightarrow O + N_2O$  ;  $k_{260} = 6.2 \cdot 10^{-12} \cdot (T/300)^{0.5}$  ; [2]
- R261.  $O(^1S) + N_2O \rightarrow O(^1D) + N_2O$  ;  $k_{261} = 3.1 \cdot 10^{-12} \cdot (T/300)^{0.5}$  ; [2]
- R262.  $O(^1S) + O_2(a) \rightarrow O(^1D) + O_2(b)$  ;  $k_{262} = 3.6 \cdot 10^{-11} \cdot (T/300)^{0.5}$  ; [2]
- R263.  $O(^1S) + O_2(a) \rightarrow O + O + O$  ;  $k_{263} = 3.4 \cdot 10^{-11} \cdot (T/300)^{0.5}$  ; [2]



R264.  $O(^1S) + O \rightarrow O(^1D) + O$  ;  $k_{264} = 5 \cdot 10^{-11} \cdot e^{-301/T}$  ; [2]

Ion-ion recombination:

R265.  $A^- + B^+ \rightarrow A + B$  ;  $k_{265} = 2 \times 10^{-7} \cdot (300/T)^{0.5}$  ; [1]

$A^-$ :  $O_2^-$ ,  $O^-$ ,  $O_3^-$ ,  $NO^-$ ,  $NO_2^-$ ,  $NO_3^-$ ,  $N_2O^-$

$B^+$ :  $N_2^+$ ,  $O_2^+$ ,  $N^+$ ,  $O^+$ ,  $NO^+$ ,  $NO_2^+$ ,  $N_2O^+$

### References

[1] Kossyi, I.A., Kostinsky, A.Yu., Matveyev, A.A., Siulakov, V.P., 1992. Kinetic scheme of the non-equilibrium discharge in nitrogen–oxygen mixtures. *Plasma Sources Science and Technology* 1, 207–220, <http://dx.doi.org/10.1088/0963-0252/1/3/011>.

[2] Sentman, D.D., Stenbaek-Nielsen, H.C., McHarg, M.G., Morrill, J.S., 2008. Plasma chemistry of sprite streamers. *Journal of Geophysical Research* 113, D11112, <http://dx.doi.org/10.1029/2007JD008941>.

[3] Gordillo-Vázquez, F.J., Luque, A., 2010. Electrical conductivity in sprite streamer channels. *J. Geophysical Research Letters* 37, L16809, <http://dx.doi.org/10.1029/2010GL044349>.

[4] Mitra, A.P., 1974. *Ionospheric effects of solar flares*, Astrophysics and Space Science Library. Virginia, USA.

## 2 Photochemistry

Table 1: Colliure photochemistry

|     | reaction                               | 50 km                  | 52 km                  | 54 km                  | 56 km                  | 58 km                  |
|-----|----------------------------------------|------------------------|------------------------|------------------------|------------------------|------------------------|
| P1  | $NO \rightarrow e + NO^+$              | $2.977 \cdot 10^{-48}$ | $5.888 \cdot 10^{-38}$ | $2.498 \cdot 10^{-30}$ | $1.117 \cdot 10^{-24}$ | $1.715 \cdot 10^{-20}$ |
| P2  | $O_2 \rightarrow O + O$                | $2.309 \cdot 10^{-10}$ | $2.902 \cdot 10^{-10}$ | $3.461 \cdot 10^{-10}$ | $3.987 \cdot 10^{-10}$ | $4.621 \cdot 10^{-10}$ |
| P3  | $O_3 \rightarrow O + O_2$              | $5.675 \cdot 10^{-4}$  | $6.165 \cdot 10^{-4}$  | $6.658 \cdot 10^{-4}$  | $7.202 \cdot 10^{-4}$  | $8.126 \cdot 10^{-4}$  |
| P4  | $O_3 \rightarrow O(^1D) + O_2$         | $1.209 \cdot 10^{-3}$  | $1.661 \cdot 10^{-3}$  | $2.123 \cdot 10^{-3}$  | $2.632 \cdot 10^{-3}$  | $3.468 \cdot 10^{-3}$  |
| P5  | $NO \rightarrow N + O$                 | $1.256 \cdot 10^{-7}$  | $1.824 \cdot 10^{-7}$  | $2.511 \cdot 10^{-7}$  | $3.319 \cdot 10^{-7}$  | $4.327 \cdot 10^{-7}$  |
| P6  | $NO_2 \rightarrow NO + O$              | $1.023 \cdot 10^{-2}$  | $1.025 \cdot 10^{-2}$  | $1.026 \cdot 10^{-2}$  | $1.026 \cdot 10^{-2}$  | $1.027 \cdot 10^{-2}$  |
| P7  | $NO_3 \rightarrow NO + O_2$            | $2.313 \cdot 10^{-2}$  | $2.304 \cdot 10^{-2}$  | $2.291 \cdot 10^{-2}$  | $2.276 \cdot 10^{-2}$  | $2.272 \cdot 10^{-2}$  |
| P8  | $NO_3 \rightarrow NO_2 + O$            | $1.750 \cdot 10^{-1}$  | $1.744 \cdot 10^{-1}$  | $1.735 \cdot 10^{-1}$  | $1.724 \cdot 10^{-1}$  | $1.721 \cdot 10^{-1}$  |
| P9  | $N_2O \rightarrow N_2 + O(^1D)$        | $1.889 \cdot 10^{-7}$  | $2.211 \cdot 10^{-7}$  | $2.507 \cdot 10^{-7}$  | $2.778 \cdot 10^{-7}$  | $3.057 \cdot 10^{-7}$  |
| P10 | $H_2O \rightarrow OH + H$              | $1.076 \cdot 10^{-12}$ | $2.820 \cdot 10^{-12}$ | $6.448 \cdot 10^{-12}$ | $1.342 \cdot 10^{-11}$ | $2.972 \cdot 10^{-11}$ |
| P11 | $H_2O \rightarrow H_2 + O(^1D)$        | $1.879 \cdot 10^{-48}$ | $3.717 \cdot 10^{-38}$ | $1.577 \cdot 10^{-30}$ | $7.054 \cdot 10^{-25}$ | $1.083 \cdot 10^{-20}$ |
| P12 | $H_2O \rightarrow H + H + O$           | $2.255 \cdot 10^{-48}$ | $4.460 \cdot 10^{-38}$ | $1.892 \cdot 10^{-30}$ | $8.464 \cdot 10^{-25}$ | $1.299 \cdot 10^{-20}$ |
| P13 | $HO_2 \rightarrow OH + O$              | $1.555 \cdot 10^{-4}$  | $2.006 \cdot 10^{-4}$  | $2.431 \cdot 10^{-4}$  | $2.836 \cdot 10^{-4}$  | $3.360 \cdot 10^{-4}$  |
| P14 | $H_2O_2 \rightarrow OH + OH$           | $3.173 \cdot 10^{-5}$  | $3.794 \cdot 10^{-5}$  | $4.383 \cdot 10^{-5}$  | $4.965 \cdot 10^{-5}$  | $5.791 \cdot 10^{-5}$  |
| P15 | $CO_2 \rightarrow CO + O$              | $1.580 \cdot 10^{-10}$ | $1.942 \cdot 10^{-10}$ | $2.280 \cdot 10^{-10}$ | $2.609 \cdot 10^{-10}$ | $3.070 \cdot 10^{-10}$ |
| P16 | $CO_2 \rightarrow CO + O(^1D)$         | $3.193 \cdot 10^{-71}$ | $8.483 \cdot 10^{-56}$ | $1.985 \cdot 10^{-44}$ | $1.117 \cdot 10^{-43}$ | $5.318 \cdot 10^{-35}$ |
| P17 | $O^- \rightarrow e + O$                | 1.510                  | 1.509                  | 1.506                  | 1.502                  | 1.503                  |
| P18 | $O_2^- \rightarrow e + O_2$            | $4.224 \cdot 10^{-1}$  | $4.229 \cdot 10^{-1}$  | $4.228 \cdot 10^{-1}$  | $4.224 \cdot 10^{-1}$  | $4.234 \cdot 10^{-1}$  |
| P19 | $O_3^- \rightarrow O^- + O_2$          | $5.166 \cdot 10^{-1}$  | $5.170 \cdot 10^{-1}$  | $5.168 \cdot 10^{-1}$  | $5.162 \cdot 10^{-1}$  | $5.171 \cdot 10^{-1}$  |
| P20 | $O_3^- \rightarrow e + O_3$            | $2.719 \cdot 10^{-2}$  | $2.721 \cdot 10^{-2}$  | $2.720 \cdot 10^{-2}$  | $2.717 \cdot 10^{-2}$  | $2.722 \cdot 10^{-2}$  |
| P21 | $O_4^- \rightarrow e + 2 \cdot O_2$    | $4.180 \cdot 10^{-1}$  | $4.193 \cdot 10^{-1}$  | $4.199 \cdot 10^{-1}$  | $4.201 \cdot 10^{-1}$  | $4.218 \cdot 10^{-1}$  |
| P22 | $CO_3^- \rightarrow O^- + CO_2$        | $1.668 \cdot 10^{-1}$  | $1.666 \cdot 10^{-1}$  | $1.661 \cdot 10^{-1}$  | $1.655 \cdot 10^{-1}$  | $1.656 \cdot 10^{-1}$  |
| P23 | $CO_4^- \rightarrow e + CO_2 + O_2$    | $4.400 \cdot 10^{-2}$  | $4.504 \cdot 10^{-2}$  | $4.590 \cdot 10^{-2}$  | $4.665 \cdot 10^{-2}$  | $4.783 \cdot 10^{-2}$  |
| P24 | $OH^- \rightarrow e + OH$              | 1.096                  | 1.094                  | 1.090                  | 1.085                  | 1.084                  |
| P25 | $NO^- \rightarrow e + NO$              | 3.206                  | 3.202                  | 3.194                  | 3.184                  | 3.183                  |
| P26 | $NO_2^- \rightarrow e + NO_2$          | $1.163 \cdot 10^{-1}$  | $1.175 \cdot 10^{-1}$  | $1.184 \cdot 10^{-1}$  | $1.192 \cdot 10^{-1}$  | $1.205 \cdot 10^{-1}$  |
| P27 | $NO_3^- \rightarrow e + NO_3$          | $1.194 \cdot 10^{-2}$  | $1.265 \cdot 10^{-2}$  | $1.328 \cdot 10^{-2}$  | $1.389 \cdot 10^{-2}$  | $1.479 \cdot 10^{-2}$  |
| P28 | $O_4^+ \rightarrow O_2^+ + O_2$        | $5.360 \cdot 10^{-1}$  | $5.353 \cdot 10^{-1}$  | $5.343 \cdot 10^{-1}$  | $5.331 \cdot 10^{-1}$  | $5.328 \cdot 10^{-1}$  |
| P29 | $O_2^+(H_2O) \rightarrow H_2O^+ + O_2$ | $4.681 \cdot 10^{-1}$  | $4.675 \cdot 10^{-1}$  | $4.666 \cdot 10^{-1}$  | $4.654 \cdot 10^{-1}$  | $4.652 \cdot 10^{-1}$  |

Table 2: Colliure photochemistry

|     | 60 km                  | 62 km                  | 64 km                  | 66 km                  | 68 km                  | 70 km                  |
|-----|------------------------|------------------------|------------------------|------------------------|------------------------|------------------------|
| P1  | $2.165 \cdot 10^{-17}$ | $4.294 \cdot 10^{-15}$ | $2.162 \cdot 10^{-13}$ | $3.942 \cdot 10^{-12}$ | $3.386 \cdot 10^{-11}$ | $1.666 \cdot 10^{-10}$ |
| P2  | $5.255 \cdot 10^{-10}$ | $5.845 \cdot 10^{-10}$ | $6.415 \cdot 10^{-10}$ | $6.997 \cdot 10^{-10}$ | $7.635 \cdot 10^{-10}$ | $8.400 \cdot 10^{-10}$ |
| P3  | $9.153 \cdot 10^{-4}$  | $1.007 \cdot 10^{-3}$  | $1.083 \cdot 10^{-3}$  | $1.138 \cdot 10^{-3}$  | $1.173 \cdot 10^{-3}$  | $1.192 \cdot 10^{-3}$  |
| P4  | $4.394 \cdot 10^{-3}$  | $5.225 \cdot 10^{-3}$  | $5.910 \cdot 10^{-3}$  | $6.412 \cdot 10^{-3}$  | $6.728 \cdot 10^{-3}$  | $6.902 \cdot 10^{-3}$  |
| P5  | $5.516 \cdot 10^{-7}$  | $6.925 \cdot 10^{-7}$  | $8.615 \cdot 10^{-7}$  | $1.063 \cdot 10^{-6}$  | $1.298 \cdot 10^{-6}$  | $1.564 \cdot 10^{-6}$  |
| P6  | $1.027 \cdot 10^{-2}$  | $1.025 \cdot 10^{-2}$  | $1.024 \cdot 10^{-2}$  | $1.022 \cdot 10^{-2}$  | $1.019 \cdot 10^{-2}$  | $1.019 \cdot 10^{-2}$  |
| P7  | $2.275 \cdot 10^{-2}$  | $2.280 \cdot 10^{-2}$  | $2.284 \cdot 10^{-2}$  | $2.289 \cdot 10^{-2}$  | $2.294 \cdot 10^{-2}$  | $2.299 \cdot 10^{-2}$  |
| P8  | $1.718 \cdot 10^{-1}$  | $1.710 \cdot 10^{-1}$  | $1.702 \cdot 10^{-1}$  | $1.693 \cdot 10^{-1}$  | $1.684 \cdot 10^{-1}$  | $1.674 \cdot 10^{-1}$  |
| P9  | $3.288 \cdot 10^{-7}$  | $3.454 \cdot 10^{-7}$  | $3.600 \cdot 10^{-7}$  | $3.730 \cdot 10^{-7}$  | $3.849 \cdot 10^{-7}$  | $3.975 \cdot 10^{-7}$  |
| P10 | $6.071 \cdot 10^{-11}$ | $1.164 \cdot 10^{-10}$ | $2.127 \cdot 10^{-10}$ | $3.747 \cdot 10^{-10}$ | $6.413 \cdot 10^{-10}$ | $1.080 \cdot 10^{-9}$  |
| P11 | $1.367 \cdot 10^{-17}$ | $2.711 \cdot 10^{-15}$ | $1.365 \cdot 10^{-13}$ | $2.488 \cdot 10^{-12}$ | $2.137 \cdot 10^{-11}$ | $1.052 \cdot 10^{-10}$ |
| P12 | $1.640 \cdot 10^{-17}$ | $3.253 \cdot 10^{-15}$ | $1.638 \cdot 10^{-13}$ | $2.986 \cdot 10^{-12}$ | $2.565 \cdot 10^{-11}$ | $1.262 \cdot 10^{-10}$ |
| P13 | $3.880 \cdot 10^{-4}$  | $4.318 \cdot 10^{-4}$  | $4.666 \cdot 10^{-4}$  | $4.921 \cdot 10^{-4}$  | $5.089 \cdot 10^{-4}$  | $5.191 \cdot 10^{-4}$  |
| P14 | $6.643 \cdot 10^{-5}$  | $7.372 \cdot 10^{-5}$  | $7.956 \cdot 10^{-5}$  | $8.380 \cdot 10^{-5}$  | $8.647 \cdot 10^{-5}$  | $8.802 \cdot 10^{-5}$  |
| P15 | $3.550 \cdot 10^{-10}$ | $3.976 \cdot 10^{-10}$ | $4.337 \cdot 10^{-10}$ | $4.628 \cdot 10^{-10}$ | $4.854 \cdot 10^{-10}$ | $5.038 \cdot 10^{-10}$ |
| P16 | $1.580 \cdot 10^{-28}$ | $1.041 \cdot 10^{-23}$ | $3.956 \cdot 10^{-20}$ | $1.782 \cdot 10^{-17}$ | $1.674 \cdot 10^{-15}$ | $5.164 \cdot 10^{-14}$ |
| P17 | 1.505                  | 1.506                  | 1.507                  | 1.508                  | 1.509                  | 1.509                  |
| P18 | $4.247 \cdot 10^{-1}$  | $4.258 \cdot 10^{-1}$  | $4.267 \cdot 10^{-1}$  | $4.273 \cdot 10^{-1}$  | $4.277 \cdot 10^{-1}$  | $4.279 \cdot 10^{-1}$  |
| P19 | $5.184 \cdot 10^{-1}$  | $5.195 \cdot 10^{-1}$  | $5.203 \cdot 10^{-1}$  | $5.209 \cdot 10^{-1}$  | $5.213 \cdot 10^{-1}$  | $5.216 \cdot 10^{-1}$  |
| P20 | $2.728 \cdot 10^{-2}$  | $2.734 \cdot 10^{-2}$  | $2.739 \cdot 10^{-2}$  | $2.742 \cdot 10^{-2}$  | $2.744 \cdot 10^{-2}$  | $2.745 \cdot 10^{-2}$  |
| P21 | $4.238 \cdot 10^{-1}$  | $4.254 \cdot 10^{-1}$  | $4.267 \cdot 10^{-1}$  | $4.276 \cdot 10^{-1}$  | $4.282 \cdot 10^{-1}$  | $4.285 \cdot 10^{-1}$  |
| P22 | $1.659 \cdot 10^{-1}$  | $1.662 \cdot 10^{-1}$  | $1.664 \cdot 10^{-1}$  | $1.666 \cdot 10^{-1}$  | $1.667 \cdot 10^{-1}$  | $1.668 \cdot 10^{-1}$  |
| P23 | $4.905 \cdot 10^{-2}$  | $5.008 \cdot 10^{-2}$  | $5.090 \cdot 10^{-2}$  | $5.148 \cdot 10^{-2}$  | $5.185 \cdot 10^{-2}$  | $5.205 \cdot 10^{-2}$  |
| P24 | 1.084                  | 1.084                  | 1.084                  | 1.084                  | 1.084                  | 1.084                  |
| P25 | 3.185                  | 3.186                  | 3.187                  | 3.188                  | 3.188                  | 3.188                  |
| P26 | $1.218 \cdot 10^{-1}$  | $1.229 \cdot 10^{-1}$  | $1.238 \cdot 10^{-1}$  | $1.244 \cdot 10^{-1}$  | $1.248 \cdot 10^{-1}$  | $1.250 \cdot 10^{-1}$  |
| P27 | $1.572 \cdot 10^{-2}$  | $1.653 \cdot 10^{-2}$  | $1.718 \cdot 10^{-2}$  | $1.765 \cdot 10^{-2}$  | $1.794 \cdot 10^{-2}$  | $1.810 \cdot 10^{-2}$  |
| P28 | $5.328 \cdot 10^{-1}$  | $5.328 \cdot 10^{-1}$  | $5.328 \cdot 10^{-1}$  | $5.328 \cdot 10^{-1}$  | $5.329 \cdot 10^{-1}$  | $5.329 \cdot 10^{-1}$  |
| P29 | $4.652 \cdot 10^{-1}$  | $4.653 \cdot 10^{-1}$  | $4.653 \cdot 10^{-1}$  | $4.653 \cdot 10^{-1}$  | $4.653 \cdot 10^{-1}$  | $4.654 \cdot 10^{-1}$  |
